# Supplementary material for: Harnessing the power of comparative genomics to support the distinction of sister species within Phyllosticta and development of highly specific detection of Phyllosticta citricarpa causing citrus black spot by real-time PCR
Source: PeerJ. 2023 Oct 23;11:e16354. doi: 10.7717/peerj.16354 (PMC10601906; doi:10.7717/peerj.16354)
Supplement: Supplemental Information 1 — Genomic resources included the genomes of strains sequenced in this study and 30 previously published genomes (Coetzee et al., 2021; Guarnaccia et al., 2019; Rodrigues et al., 2019) which were downloaded either from the MycoCosm database or the National Center of Biotechnology Information (NCBI) Sequence Read Archive (SRA) database. Strains highlighted in yellow correspond to those used in the phylogenetic study. [file peerj-11-16354-s001.xlsx]

## Sheet: Sheet1
Strain ID	Species	Country	Host	Collection year	Reference	Total length Mb	GC%	N50	L50	%BUSCO genes
LSVM607	P. capitalensis	China	C. maxima	2012	This study	31	56.44	521149	27	98.5
GM33	P. capitalensis	USA	C. sinensis	-	Rodrigues et al. (2019)
CBS356.52	P. capitalensis	-	Ilex sp.	-	https://mycocosm.jgi.doe.gov/Phcapi1/Phcapi1.home.html
LSVM1146	P. citriasiana	China	C. maxima	2014	This study	34	51.5	143100	64	98.7
CBS120486	P. citriasiana	Thailand	C. maxima	-	Guarnaccia et al (2017)
LSVM204	P. citriasiana	Unknown	Citrus sp. (cv. unknown)	2007	This study	34	51.5	147800	69	98.1
LSVM1095	P. citriasiana	Vietnam	Citrus sp. (cv. unknown)	2014	This study	34	52	195100	58	98.8
CBS10098	P. citribrazilensis	Brazil	Citrus sp. (cv. unknown)	-	Guarnaccia et al (2017)
CPC 16586	P. citricarpa	Argentina	C. limon	-	Guarnaccia et al. 2019
CBS 127454	P. citricarpa	Australia	C. limon	2009	Guarnaccia et al. 2019
LGMF06	P. citricarpa	Brazil	C. sinensis	-	Coetzee et al. 2021
CGMCC3.14348	P. citricarpa	China	C. reticulata	2009	Coetzee et al. 2021
CBS 111.20	P. citricarpa	China	Citrus sp. (cv. unknown)	-	Guarnaccia et al. 2019
CBS 141350 = CPC 27913	P. citricarpa	Malta	C. sinensis, leaf litter	-	Guarnaccia et al. 2019
CBS 141352	P. citricarpa	Portugal	C. sinensis, leaf litter	-	Guarnaccia et al. 2019
CBS 122670	P. citricarpa	South Africa	C. sinensis cv. Valencia	2005	Guarnaccia et al. 2019
LSV M1101	P. citricarpa	South Africa	C. sinensis x Poncirus trifoliata	2014	This study	32	54.51	289734	42	98
LSV M359	P. citricarpa	Togo	Citrus sp.	2010	This study	32	52	202600	47	98
LSV M1499	P. citricarpa	Tunisia	C. limon	2019	This study	31	53.5	223119	43	98.1
Gc12	P. citricarpa	USA	C. sinensis cv. Valencia	2011	Rodrigues et al. (2019)
USA106	P. citricarpa	USA	C. sinensis cv. Valencia	2011	Coetzee et al. 2021
USA109	P. citricarpa	USA	C. sinensis cv. Valencia	2011	Coetzee et al. 2021
USA110	P. citricarpa	USA	C. sinensis cv. Valencia	2011	Coetzee et al. 2021
USA111	P. citricarpa	USA	C. sinensis cv. Valencia	2011	Coetzee et al. 2021
USA119	P. citricarpa	USA	C. sinensis cv. Valencia	2011	Coetzee et al. 2021
USA120	P. citricarpa	USA	C. sinensis cv. Valencia	2011	Coetzee et al. 2021
USA121	P. citricarpa	USA	C. sinensis cv. Valencia	2011	Coetzee et al. 2021
USA122	P. citricarpa	USA	C. sinensis cv. Valencia	2011	Coetzee et al. 2021
USA14	P. citricarpa	USA	C. sinensis cv. Valencia	2011	Coetzee et al. 2021
USA27	P. citricarpa	USA	C. sinensis cv. Valencia	2011	Coetzee et al. 2021
USA28	P. citricarpa	USA	C. sinensis cv. Valencia	2011	Coetzee et al. 2021
USA43	P. citricarpa	USA	C. sinensis cv. Valencia	2011	Coetzee et al. 2021
USA48	P. citricarpa	USA	C. sinensis cv. Valencia	2011	Coetzee et al. 2021
USA66	P. citricarpa	USA	C. sinensis cv. Valencia	2011	Coetzee et al. 2021
USA68	P. citricarpa	USA	C. sinensis cv. Valencia	2011	Coetzee et al. 2021
USA73	P. citricarpa	USA	C. sinensis cv. Valencia	2011	Coetzee et al. 2021
USA74	P. citricarpa	USA	C. sinensis cv. Valencia	2011	Coetzee et al. 2021
CBS 131864	P. citricarpa	USA	C. sinensis cv. Valencia	2012	Guarnaccia et al. 2019
CBS 122482	P. citricarpa	Zimbabwe	C. sinensis	2008	Guarnaccia et al. 2019
LSV M1123	P. citricarpa	Zimbabwe	C. sinensis	2014	This study	33	52	190600	52	98.1
LSVM1289	P. citrichinaensis	China	C. maxima	2015	This study	29	55.09	255573	38	97.9
LSV M1238	P. paracitricarpa	Bangladesh	C. pennivesiculata	2015	This study
ZJUCC200937	P. paracitricarpa	China	C. sinensis cv. Bingtangcheng	2009	This study	32	52.5	313200	134	99.2
CBS 141357 = CPC 27169	P. paracitricarpa	Greece	C. sinensis, leaf litter	2016	Guarnaccia et al. 2019
CBS 141358 = CPC 27170	P. paracitricarpa	Greece	C. sinensis, leaf litter	2015	Guarnaccia et al. 2019
GIHF	P. paracitricarpa	China	Citrus sp. (cv. unknown)	-	This study	32	52	280800	37	98.3
