# Supplementary material for: Harnessing the power of comparative genomics to support the distinction of sister species within Phyllosticta and development of highly specific detection of Phyllosticta citricarpa causing citrus black spot by real-time PCR
Source: PeerJ. 2023 Oct 23;11:e16354. doi: 10.7717/peerj.16354 (PMC10601906; doi:10.7717/peerj.16354)
Supplement: Supplemental Information 2 — Accessions in red indicate the sequences that were submitted to GenBank. Accessions in blue indicate that the isolate has the same sequence that the one submitted (indicated in red) to GenBank. Accessions in green indicate the sequences that were unique to the species, and submitted to GenBank. Accessions in black are from other studies. [file peerj-11-16354-s002.xlsx]

## Sheet: Feuil1
Supplemental information 3
Accessions in red indicate the sequences that were submitted to Genbank.
Accessions in blue indicate that the isolate has the same sequence that the one submitted (indicated in red) to Genbank.
Accessions in green indicate the sequences that were unique to the species, and submitted to Ganbank.
Accessions in black are from other studies
			GenBank accession number
			ITS		LSU	TEF
SPECIES	CODE		ITS5-4	ITS1-4	LROR-LR5	EF1-728F/EF2	EF1-EF2
Phyllosticta citricarpa	LSVM 205			OQ596530
	LSVM 359		OQ555661		OQ735407	MN823081
	LSVM 494			OQ596530
	LSVM 1101		OQ555661		OQ735407	MN823081
	LSVM 1102		OQ555661		OQ735407	MN823081
	LSVM 1103			OQ596530
	LSVM 1116		OQ555661		OQ735407	MN823081
	LSVM 1123		OQ555661		OQ735407	MN823081
	LSVM 1228		OQ555661		OQ735407	MN823081
	LSVM 1243		OQ555661		OQ735407	MN823081
	LSVM 1244		OQ555661		OQ735407	MN823081
	LSVM 1266			OQ600723
	LSVM 1268		OQ555661		OQ735407	MN823081
	LSVM 1270		OQ555661		OQ735407	MN823081
	LSVM 1276			OQ596530
	CBS 141350 / LSVM 1477		KY855614		KY855785	KY855943
	CBS 141351 / LSVM 1478		KY855618		KY855789	KY855947
	LSVM 1499		OQ555661		OQ735407	MN823081
	LSVM 1500		OQ555661		OQ735407	MN823081
	LSVM 1501		OQ555661		OQ735407	MN823081
	LSVM 1502		OQ555661		OQ735407	MN823081
	GC-115					MN823081
	GC-129					MN823081
	GC-130					MN823081
	GC-131					MN823081
	GC-133					MN823081
P. paracitricarpa	CBS 141357 / LSVM1476		KY855635		KY855809	KY855964
	CBS 141359		KY855637		KY855811	KY855966
	ZJUCC200937		JN791627		KY855814	JN791470
	LSVM 1238		OQ818622		OQ819008	OQ863230
	GIHF 303				OQ818310	OQ863229
P. citriasiana	LSVM 1146		OQ600798		OQ816808	OQ863228
	LSVM 204		OQ600798		OQ816808	OQ863224
	LSVM 608		OQ600803		OQ816807	OQ863228
	LSVM 903		OQ600798		OQ816808	OQ863224
	CBS 123393		FJ538358		/	FJ538416
	LSVM 1147		OQ600798		OQ816808	OQ863228
	LSVM 1152		OQ600798		OQ816808	OQ863228
	LSVM 1165		OQ600798		OQ816808	OQ863224
	LSVM 1174		OQ600798		OQ816808	OQ863228
	LSVM 1279		OQ600798		OQ816808	OQ863228
P. capitalensis	LSVM 502		OQ601535		OQ816809	OQ863225
	LSVM 607		OQ601535		OQ816810	OQ863226
	LSVM 1089		OQ601535		OQ816810	OQ863226
	LSV M 1104		OQ601575		OQ816810	OQ863226
	LSV M 1117		OQ601535		OQ816810	OQ863225
	LSVM 1119		OQ601559		OQ816810	OQ863227
	LSV M 1124		OQ601535		OQ816810	OQ863227
	LSVM 1163		OQ601535		OQ816810	OQ863226
	LSVM 1166		OQ615949		OQ816810	OQ863226
	LSVM 1226		OQ601535		OQ816810	OQ863225
	LSVM 1245		OQ601535		OQ816810	OQ863225
P. citrichinaensis	CBS 129764 / LSVM 1094		JN791598		KY855794	JN791453
P. citribraziliensis	CBS 100098 / LSVM 1098		FJ538352		KF206221	FJ538410
P. paracapitalensis	CBS 141353		KY855622		KY855796	KY855951
Phyllosticta sp.	LSVM 1173	Seq1		OQ682487
Colletotrichum gloeosporioides	LSVM 935	Seq2		OQ682488
Neofusicoccum parvum	LSVM 884	Seq3		OQ682489
Fusarium oxysporum	LSVM 902	Seq4		OQ682490
Rhizoctonia solani	LSVM 392	Seq5		OQ682491
Passalora loranthi	LSVM 1133	Seq6		OQ682492
Elsinoe fawcettii	DUDA-IMK-TEM-3 / LSVM1347	Seq7		OQ682493
Elsinoe fawcettii	CBS 233.64 / LSVM1315		KX887222		KX886985	KX886868
Elsinoe fawcettii	USA-Russel-15 / LSVM1306	Seq8		OQ682494
Elsinoe fawcettii	CC-3 / LSVM1343	Seq9		OQ682495
Elsinoe fawcettii	PK-MUR-L3 / LSVM 1361	Seq10		OQ682496
Elsinoe fawcettii	DUDA-IMK-TEM-2	Seq11		OQ682497
Elsinoe australis	CBS 229.64 / LSVM1316		KX887196		KX886960	KX886842
Elsinoe australis	SOS 53525 / LSVM1487	Seq12	OQ682498
Elsinoe citricola	CBS 141876		KX887207		KX886970	KX886853
Alternaria alternata	LSVM 1108	Seq13		OQ682499
Pseudocercospora angolensis	C-ethiop 3 / LSVM1325	Seq14		OQ682500
Diaporthe sp.	LSV M 1109	Seq15		OQ682501
Fusarium proliferatum	LSV M 1168						OQ863231
Periconia sp.	LSV M 1139	Seq16		OQ682502
Penicillium italicum	Penicillium 1		MG956789
Ramichloridium cerophilum	LSV M 1176	Seq17		OQ682503
