# Supplementary material for: Harnessing the power of comparative genomics to support the distinction of sister species within Phyllosticta and development of highly specific detection of Phyllosticta citricarpa causing citrus black spot by real-time PCR
Source: PeerJ. 2023 Oct 23;11:e16354. doi: 10.7717/peerj.16354 (PMC10601906; doi:10.7717/peerj.16354)
Supplement: Supplemental Information 8 — Testing of citrus fruits showing CBS-like symptoms by the cCBS PCR, qCBS qPCR, and van Gent-Pelzer et al. (2007) qPCR. The 18S uni test was conducted to verify the amplifiability of the DNA extracts. The mean and standard deviation of Ct values were generated with two replicates. N.t stands for not tested [file peerj-11-16354-s008.xlsx]

## Sheet: Feuil1
Supplemental information 8: raw data information for Table3. Testing of citrus fruits showing CBS-like symptoms by the cCBS PCR, qCBS qPCR, and van Gent-Pelzer et al. (2007) qPCR. The 18S uni test was conducted to verify the amplifiability of the DNA extracts. The mean and standard deviation of Ct values were generated with two replicates. N.t stands for not tested
	qCBS			Van Gent Pelzer			18S uni			cCBS
Samples	Ct	Mean Ct	SD	Ct	Mean Ct	SD	Ct	Mean Ct	SD
18-429/2a	28.98	28.74	0.339411	18.66	18.78	0.169706	11.67	11.67	0	+
	28.5			18.9			11.67			+
18-429/2b	29.04	29.01	0.0424264	20.07	20.07	0	12.04	11.97	0.0989949	+
	28.98			20.07			11.9			+
18-429/2c	28.88	28.87	0.0141421	20.35	20.38	0.0424264	12.19	12.23	0.0565685	+
	28.86			20.41			12.27			+
18-429/2d	27.84	27.63	0.296985	17.44	17.375	0.0919239	10.78	10.74	0.0565685	+
	27.42			17.31			10.7			+
18-429/2e	27.34	27.715	0.53033	18.11	18.055	0.0777817	10.96	10.935	0.0353553	+
	28.09			18			10.91			+
18-429/2f	28.76	30.41	2.33345	19.94	19.935	0.00707107	10.79	10.755	0.0494975	nt
	32.06			19.93			10.72			nt
18-429/2g	32.89	32.685	0.289914	23.59	23.545	0.0636396	12.82	12.79	0.0424264	+
	32.48			23.5			12.76			+
18-429/4a	24.37	24.165	0.289914	17.1	16.94	0.226274	15.46	15.37	0.127279	nt
	23.96			16.78			15.28			nt
18-429/4b	29.5	28.61	1.25865	13.37	13.985	0.869741	11.98	11.995	0.0212132	+
	27.72			14.6			12.01			+
18-429/4c	23.87	24.05	0.254558	16.67	16.44	0.325269	13.88	13.8	0.113137	+
	24.23			16.21			13.72			+
18-429/4d	23.53	23.55	0.0282843	15.25	15.195	0.0777817	11.6	11.39	0.296985	+
	23.57			15.14			11.18			+
18-429/4e	24.37	24.59	0.311127	16.67	16.52	0.212132	12.76	12.675	0.120208	+
	24.81			16.37			12.59			+
18-429/4f	33.36	33.025	0.473762	24.98	24.99	0.0141421	15.87	15.945	0.106066	+
	32.69			25			16.02			+
18-429/4g	27.42	27.295	0.176777	19.41	19.385	0.0353553	14.86	14.84	0.0282843	+
	27.17			19.36			14.82			+
18-429/5a	31.75	31.78	0.0424264	23.12	23.155	0.0494975	12.44	12.47	0.0424264	+
	31.81			23.19			12.5			+
18-429/5b	31.28	31.285	0.00707107	21.99	21.92	0.0989949	12.34	12.85	0.721249	+
	31.29			21.85			13.36			+
18-429/5c	30.22	30.035	0.26163	21.58	21.575	0.00707107	11.63	11.63	0	+
	29.85			21.57			11.63			+
18-429/5d	29.52	29.575	0.0777817	21.17	21.035	0.190919	12.58	12.51	0.0989949	+
	29.63			20.9			12.44			+
18-429/5e	29.38	29.3	0.113137	20.71	20.69	0.0282843	12.44	12.45	0.0141421	+
	29.22			20.67			12.46			+
18-429/5f	32.21	32.095	0.162635	22.88	22.865	0.0212132	14.44	14.415	0.0353553	+
	31.98			22.85			14.39			+
18-429/5g	30.05	30.03	0.0282843	21.53	21.555	0.0353553	13.58	13.52	0.0848528	+
	30.01			21.58			13.46			+
18-429/6a	28.62	28.555	0.0919239	19.97	19.975	0.00707107	10	9.955	0.0636396	+
	28.49			19.98			9.91			+
18-429/6b	28.61	28.4	0.296985	19.67	19.64	0.0424264	9.03	8.995	0.0494975	+
	28.19			19.61			8.96			+
18-429/6c	30.1	30.37	0.381838	21.92	21.905	0.0212132	9.71	9.69	0.0282843	+
	30.64			21.89			9.67			+
18-429/6d	30.65	30.76	0.155563	22.09	21.99	0.141421	8.91	8.99	0.113137	+
	30.87			21.89			9.07			+
18-429/6e	30.37	30.42	0.0707107	21.51	21.42	0.127279	9.49	9.475	0.0212132	+
	30.47			21.33			9.46			+
18-429/6f	31.74	31.675	0.0919239	22.76	22.8	0.0565685	8.92	8.82	0.141421	+
	31.61			22.84			8.72			+
18-429/6g	32.88	33.13	0.353553	24.15	24.115	0.0494975	9.72	9.775	0.0777817	+
	33.38			24.08			9.83			+
18-349	31.87	31.57	0.424264	23.78	23.78	0	12.31	12.39	0.113137	+
	31.27			23.78			12.47			+
18-374	34.42	35.13	1.00409	27.58	27.45	0.183848	14.35	14.345	0.00707107	+
	35.84			27.32			14.34			+
18-460/1	29.01	28.765	0.346482	20.93	20.825	0.148492	11.61	11.605	0.00707107	+
	28.52			20.72			11.6			+
18-551	32.9	33.025	0.176777	22.56	22.48	0.113137	11.56	11.18	0.537401	+
	33.15			22.4			10.8			+
18-552	30.93	31.06	0.183848	20.21	20.205	0.00707107	9.47	9.25	0.311127	+
	31.19			20.2			9.03			+
19-065	32.45	32.13	0.452548	21.24	21.23	0.0141421	8.68	8.725	0.0636396	nt
	31.81			21.22			8.77			nt
19-116	28.88	28.82	0.0848528	17.69	17.785	0.13435	8.5	8.31	0.268701	+
	28.76			17.88			8.12			+
19-117	Neg	#DIV/0!	#DIV/0!	Neg	35.78	#DIV/0!	8.74	8.775	0.0494975	-
	Neg			35.78			8.81			-
19-118	28.99	28.895	0.13435	18.68	18.685	0.00707107	9.77	9.77	0	+
	28.8			18.69			9.77			+
19-119	34.69	34.56	0.183848	23.3	23.25	0.0707107	8.56	8.57	0.0141421	+
	34.43			23.2			8.58			+
19-133	24.65	24.32	0.46669	13.35	13.43	0.113137	10.83	10.79	0.0565685	+
	23.99			13.51			10.75			+
19-146/a	29.59	29.525	0.0919239	17.98	17.97	0.0141421	7.91	7.92	0.0141421	+
	29.46			17.96			7.93			+
19-159/2	Neg	#DIV/0!	#DIV/0!	Neg	#DIV/0!	#DIV/0!	10.69	10.72	0.0424264	-
	Neg			Neg			10.75			-
19-5150/1	31.4	31.285	0.162635	19.74	19.655	0.120208	8.06	8.315	0.360624	+
	31.17			19.57			8.57			+
19-5150/2	30.65	30.59	0.0848528	19.64	19.515	0.176777	8.69	8.66	0.0424264	+
	30.53			19.39			8.63			+
19-5150/3	32.32	32.37	0.0707107	20.24	20.235	0.00707107	7.65	7.645	0.00707107	+
	32.42			20.23			7.64			+
19-5150/4	30.68	30.745	0.0919239	19.69	19.64	0.0707107	9.76	9.705	0.0777817	+
	30.81			19.59			9.65			+
19-5150/5	33.28	33.105	0.247487	21.86	21.825	0.0494975	8.91	8.85	0.0848528	+
	32.93			21.79			8.79			+
19-5241/1	36.56	36.27	0.410122	24.41	24.445	0.0494975	11.38	11.325	0.0777817	+
	35.98			24.48			11.27			+
19-5241/2	31.47	31.37	0.141421	20.18	20.25	0.0989949	8.82	8.825	0.00707107	nt
	31.27			20.32			8.83			nt
20-2990	28.72	28.685	0.0494975	18.37	18.455	0.120208	9.6	9.6	0	+
	28.65			18.54			9.6			+
20-2999/1	34.93	35.015	0.120208	22.5	22.54	0.0565685	10.02	9.965	0.0777817	+
	35.1			22.58			9.91			+
20-3282/1	Neg	#DIV/0!	#DIV/0!	35.06	35.04	0.0282843	8.48	8.495	0.0212132	-
	Neg			35.02			8.51			-
20-3282/2	32.62	32.735	0.162635	22.36	22.55	0.268701	8.5	8.515	0.0212132	+
	32.85			22.74			8.53			+
20-3493/1	30.31	30.285	0.0353553	20.14	20.055	0.120208	9.44	9.43	0.0141421	+
	30.26			19.97			9.42			+
20-3493/2	35.79	35.815	0.0353553	24.55	24.425	0.176777	9.75	9.785	0.0494975	+
	35.84			24.3			9.82			+
20-3493/3	33.97	33.825	0.205061	22.67	22.745	0.106066	9.41	9.4	0.0141421	+
	33.68			22.82			9.39			+
20-3493/4	33.87	33.75	0.169706	22.79	22.795	0.00707107	9.96	9.945	0.0212132	+
	33.63			22.8			9.93			+
20-3493/5	33.36	33.42	0.0848528	22.48	22.505	0.0353553	9.85	9.87	0.0282843	+
	33.48			22.53			9.89			+
20-3504/1	31.89	31.69	0.282843	21.32	21.34	0.0282843	8.71	8.695	0.0212132	+
	31.49			21.36			8.68			+
20-3504/2	32.83	32.825	0.00707107	22.03	22.03	0	9.85	9.835	0.0212132	+
	32.82			22.03			9.82			+
20-3504/4	35.98	36.22	0.339411	24.66	24.635	0.0353553	8.65	8.64	0.0141421	+
	36.46			24.61			8.63			+
20-3504/5	31.76	31.95	0.268701	21.71	21.58	0.183848	9.36	9.32	0.0565685	+
	32.14			21.45			9.28			+
19-146/b	31.92	31.745	0.247487	20.64	20.645	0.00707107	7.88	7.855	0.0353553	+
	31.57			20.65			7.83			+
20-0479	32.27	32.245	0.0353553	22.47	22.415	0.0777817	12.34	12.365	0.0353553	+
	32.22			22.36			12.39			+
TN1-F01	32.46	32.62	0.226274	22.65	22.56	0.127279	10.64	10.665	0.0353553	+
	32.78			22.47			10.69			+
TN1-F02	35.45	36.1	0.919239	25.53	25.495	0.0494975	9.9	9.895	0.00707107	nt
	36.75			25.46			9.89			nt
TN1-F03	34.2	34.115	0.120208	23.06	23.035	0.0353553	8.89	8.89	0	+
	34.03			23.01			8.89			+
TN1-F04	35.55	35.355	0.275772	24.33	24.35	0.0282843	10.05	10.26	0.296985	+
	35.16			24.37			10.47			+
TN1-F05	33.65	33.46	0.268701	22.56	22.57	0.0141421	9.69	9.685	0.00707107	+
	33.27			22.58			9.68			+
TN1-F06	33.88	34.17	0.410122	23.85	23.795	0.0777817	10.54	10.555	0.0212132	+
	34.46			23.74			10.57			+
TN1-F07	35.66	35.35	0.438406	24.61	24.635	0.0353553	8.77	8.73	0.0565685	+
	35.04			24.66			8.69			+
TN1-F08	36.02	36.395	0.53033	25.14	25.14	0	10.6	10.605	0.00707107	+
	36.77			25.14			10.61			+
TN1-F09	32.58	32.305	0.388909	22.22	22.14	0.113137	11.8	11.785	0.0212132	+
	32.03			22.06			11.77			+
TN1-F10	32.28	32.435	0.219203	22.42	22.41	0.0141421	10.63	10.675	0.0636396	+
	32.59			22.4			10.72			+
TN1-F11	31.79	32.155	0.516188	21.95	21.95	0	10.57	10.61	0.0565685	+
	32.52			21.95			10.65			+
TN1-F12	33.1	33.225	0.176777	23.05	23.06	0.0141421	10.56	10.5	0.0848528	+
	33.35			23.07			10.44			+
TN2-F01	32.58	32.48	0.141421	23.31	23.31	0	9.59	9.68	0.127279	+
	32.38			23.31			9.77			+
TN2-F05	35.02	34.95	0.0989949	24.83	24.835	0.00707107	10.55	10.62	0.0989949	+
	34.88			24.84			10.69			+
AR-F01	33.52	33.425	0.13435	23.51	23.52	0.0141421	11.66	11.545	0.162635	+
	33.33			23.53			11.43			+
AR-F02	34.15	34.54	0.551543	24.09	24.07	0.0282843	11.72	11.86	0.19799	+
	34.93			24.05			12			+
AR-F03	31.83	31.975	0.205061	22.87	22.83	0.0565685	12.18	12.19	0.0141421	+
	32.12			22.79			12.2			+
AR-F04	33.69	33.335	0.502046	22.89	22.92	0.0424264	11.28	11.28	0	+
	32.98			22.95			11.28			+
AR-F05	32.54	32.245	0.417193	22.61	22.645	0.0494975	11.19	11.2	0.0141421	+
	31.95			22.68			11.21			+
AR-F06	32.01	32.085	0.106066	22.38	22.42	0.0565685	12.21	12.27	0.0848528	+
	32.16			22.46			12.33			+
20-01348	Neg	#DIV/0!	#DIV/0!	Neg	#DIV/0!	#DIV/0!	8.95	8.875	0.106066	-
	Neg			Neg			8.8			-
20-01427	Neg	#DIV/0!	#DIV/0!	Neg	#DIV/0!	#DIV/0!	10.49	10.46	0.0424264	-
	Neg			Neg			10.43			-
20-04070	Neg	#DIV/0!	#DIV/0!	Neg	#DIV/0!	#DIV/0!	10.71	10.68	0.0424264	-
	Neg			Neg			10.65			-
20-02794	Neg	#DIV/0!	#DIV/0!	Neg	#DIV/0!	#DIV/0!	9.18	9.315	0.190919	-
	Neg			Neg			9.45			-
20-02836	Neg	#DIV/0!	#DIV/0!	27.85	32.21	6.16597	9.94	9.955	0.0212132	-
	Neg			36.57			9.97			-
20-5365	Neg	#DIV/0!	#DIV/0!	Neg	#DIV/0!	#DIV/0!	11.69	11.595	0.13435	-
	Neg			Neg			11.5			-
21-00466	Neg	#DIV/0!	#DIV/0!	Neg	#DIV/0!	#DIV/0!	8.47	8.51	0.0565685	-
	Neg			Neg			8.55			-
21-01914	Neg	#DIV/0!	#DIV/0!	Neg	#DIV/0!	#DIV/0!	8.75	8.74	0.0141421	-
	Neg			Neg			8.73			-
21-03392	Neg	#DIV/0!	#DIV/0!	Neg	#DIV/0!	#DIV/0!	12.47	12.445	0.0353553	-
	Neg			Neg			12.42			-
333	24.94	25.02	0.113137	19.76	19.77	0.0141421	nt	#DIV/0!	#DIV/0!	+
	25.1			19.78			nt			+
483	25.35	25.265	0.120208	20.11	20.13	0.0282843	nt	#DIV/0!	#DIV/0!	+
	25.18			20.15			nt			+
507	25.39	25.15	0.339411	19.68	19.745	0.0919239	nt	#DIV/0!	#DIV/0!	+
	24.91			19.81			nt			+
546	24.73	24.775	0.0636396	19.74	19.84	0.141421	nt	#DIV/0!	#DIV/0!	+
	24.82			19.94			nt			+
599	23.26	22.97	0.410122	18.45	18.455	0.00707107	nt	#DIV/0!	#DIV/0!	+
	22.68			18.46			nt			+
626	24.2	24.14	0.0848528	18.21	18.135	0.106066	nt	#DIV/0!	#DIV/0!	+
	24.08			18.06			nt			+
647	25.15	25.115	0.0494975	20.17	20.145	0.0353553	nt	#DIV/0!	#DIV/0!	+
	25.08			20.12			nt			+
686	28.76	29.08	0.452548	24.23	24.18	0.0707107	nt	#DIV/0!	#DIV/0!	+
	29.4			24.13			nt			+
703	27.9	27.86	0.0565685	22.7	22.655	0.0636396	nt	#DIV/0!	#DIV/0!	+
	27.82			22.61			nt			+
816	23.74	23.9	0.226274	18.64	18.625	0.0212132	nt	#DIV/0!	#DIV/0!	+
	24.06			18.61			nt			+
890	25.17	25.235	0.0919239	20.44	20.39	0.0707107	nt	#DIV/0!	#DIV/0!	+
	25.3			20.34			nt			+
897	24.26	24.335	0.106066	18.72	18.685	0.0494975	nt	#DIV/0!	#DIV/0!	+
	24.41			18.65			nt			+
907	26.96	26.95	0.0141421	22.27	22.29	0.0282843	nt	#DIV/0!	#DIV/0!	+
	26.94			22.31			nt			+
1029	27.57	27.9	0.46669	23.07	23.065	0.00707107	nt	#DIV/0!	#DIV/0!	+
	28.23			23.06			nt			+
1069	27.49	27.45	0.0565685	22.22	22.165	0.0777817	nt	#DIV/0!	#DIV/0!	+
	27.41			22.11			nt			+
