# Supplementary material for: Harnessing the power of comparative genomics to support the distinction of sister species within Phyllosticta and development of highly specific detection of Phyllosticta citricarpa causing citrus black spot by real-time PCR
Source: PeerJ journal article supplement (doi:10.7717/peerj.16354), 2023-10-23
Supplement: Supplemental_information_7.pdf [file Supplemental_information_7.pdf]

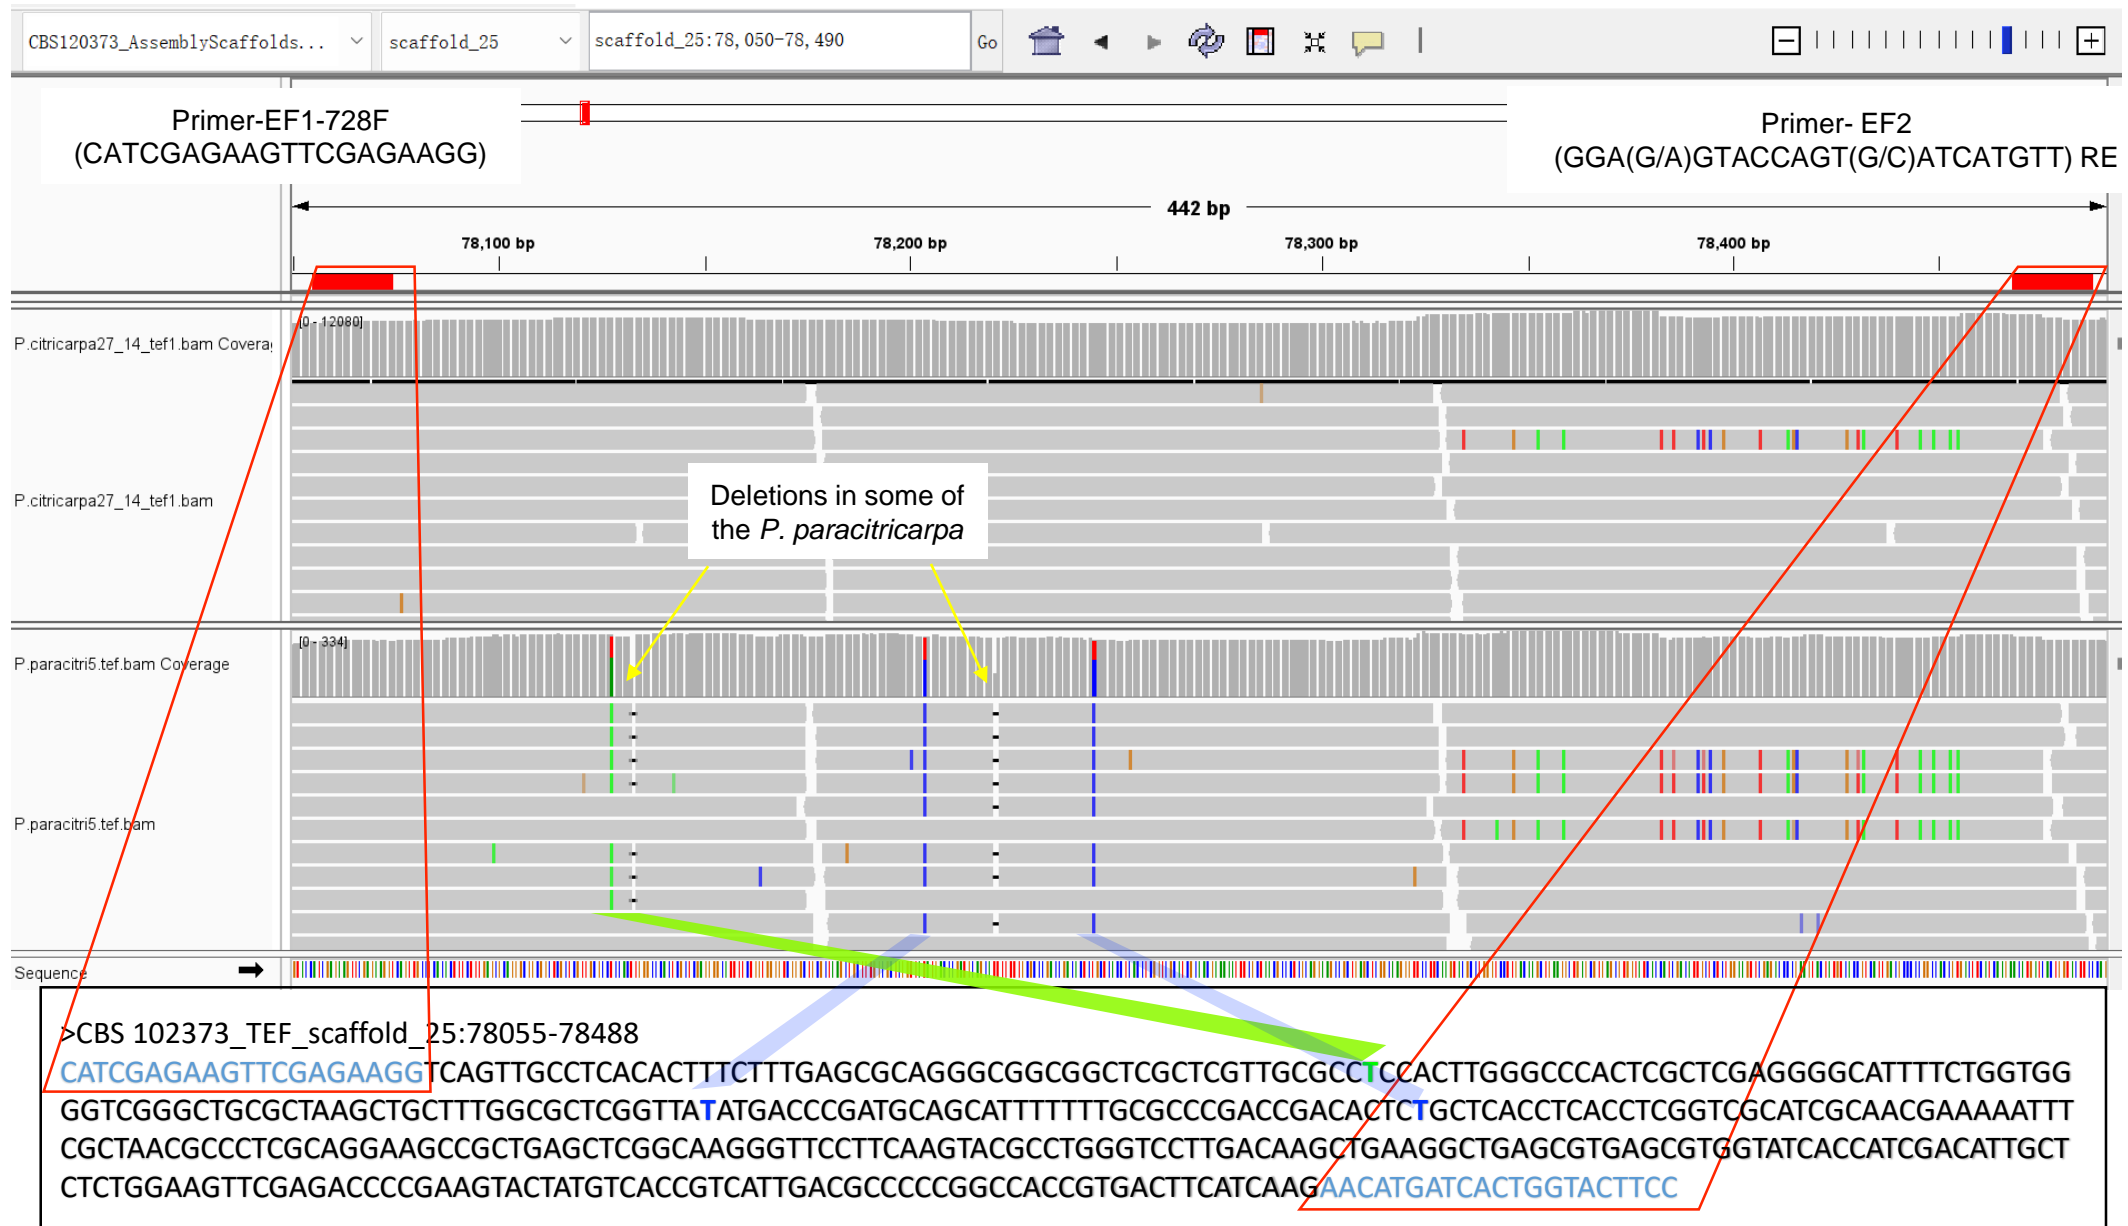

**Supplemental information 7:** Genomic variations present in the *P. paracitricarpa* isolates in the *tef1* locus. Read alignments of the strains belonging to the *P. citricarpa* and *P. paracitricarpa* populations were checked using the Integrative Genomics Viewer (IGV).
